# Supplementary material for: Synthesis and characterization of {Mo72Fe30}-coated large hexagonal gibbsite γ-Al(OH)3 platelets
Source: Royal Society of Chemistry journal article supplement (doi:10.1039/b800680f), 2008-01-01
Supplement: b800680f.pdf [file b800680f.pdf]

## Synthesis and characterization of $\{\text{Mo}_{72}\text{Fe}_{30}\}$ -coated large hexagonal gibbsite $\gamma\text{-Al}(\text{OH})_3$ platelets

Soumyajit Roy\*, Hans J. D. Meeldijk, Andrei V. Petukhov, Marjan Versluijs and Fouad Soulimani

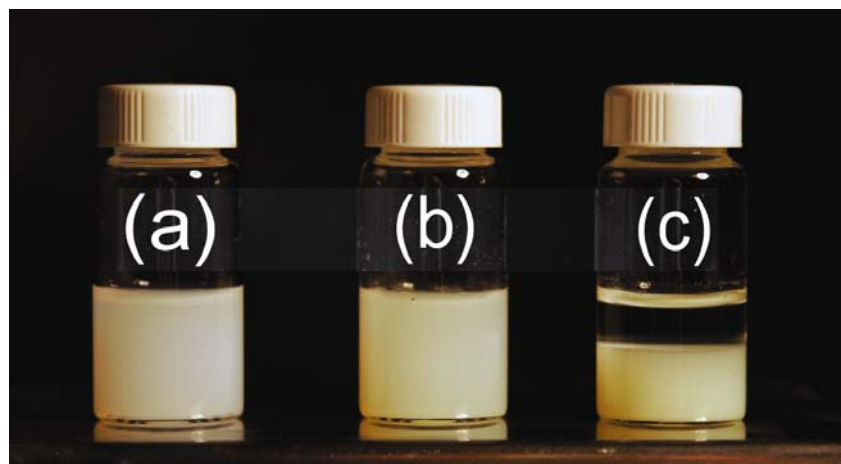

Fig. S1. Colour version of Fig. 2. (a) Starting (bluish) gibbsite dispersion; (b) changes colour (yellow) after the addition of crystals of  $\{\text{Mo}_{72}\text{Fe}_{30}\}$  to the dispersion and stirring; (c) finally leading to the composite  $\{\text{Mo}_{72}\text{Fe}_{30}\}$ @gibbsite as a (yellow) gel at the bottom.
